# Supplementary material for: Optimization of Molecular Approaches to Genogroup Neisseria meningitidis Carriage Isolates and Implications for Monitoring the Impact of New Serogroup B Vaccines
Source: PLOS journal article supplement (doi:10.1371/journal.pone.0132140), 2015-07-06
Supplement: S2 (10.1371/journal.pone.0132140.s002) [file journal.pone.0132140.s002]

**S2 Table. Serogroup, genogroup and Ct values of *porA*, *ctrA* and eight genogrouping rt-PCR assays in 234 carriage isolates.**

| Strain  | Group (SASG) | GGroup rt-PCR | cnl PCR    | porA Ct | ctrA Ct | NmA Ct | NmB Ct | NmC Ct | NmW Ct | NmX Ct | NmY Ct | NmE Ct* | NmE Ct | NmZ Ct* | NmZ Ct | porA-ctrA | Delta Ct |
|---------|--------------|---------------|------------|---------|---------|--------|--------|--------|--------|--------|--------|---------|--------|---------|--------|-----------|----------|
| PMB1475 | NG           | NGG           | <i>cnl</i> | 24.18   | No Ct   | No Ct  | No Ct  | No Ct  | No Ct  | No Ct  | No Ct  | 39.26   | ND     | No Ct   | ND     | NA        |          |
| PMB3421 | NG           | NGG           | <i>cnl</i> | 20.75   | No Ct   | No Ct  | No Ct  | No Ct  | No Ct  | No Ct  | No Ct  | No Ct   | ND     | No Ct   | ND     | NA        |          |
| PMB995  | NG           | NGG           | <i>cnl</i> | 26.60   | No Ct   | No Ct  | No Ct  | No Ct  | No Ct  | No Ct  | No Ct  | No Ct   | ND     | No Ct   | ND     | NA        |          |
| PMB643  | NG           | B             |            | 14.92   | 15.08   | No Ct  | 29.93  | No Ct  | No Ct  | No Ct  | 34.54  | No Ct   | ND     | No Ct   | ND     | 0.2       | 19.6     |
| PMB3316 | NG           | NGG           | <i>cnl</i> | 16.03   | 16.38   | No Ct  | No Ct  | No Ct  | No Ct  | No Ct  | No Ct  | No Ct   | ND     | No Ct   | ND     | 0.3       |          |
| PMB1525 | NG           | NGG           | <i>cnl</i> | 23.98   | 34.10   | No Ct  | No Ct  | No Ct  | No Ct  | No Ct  | No Ct  | 37.24   | ND     | No Ct   | ND     | 10.1      |          |
| PMB1345 | NG           | NGG           | <i>cnl</i> | 23.02   | No Ct   | No Ct  | No Ct  | No Ct  | No Ct  | No Ct  | No Ct  | 37.57   | ND     | No Ct   | ND     | NA        |          |
| PMB1462 | NG           | NGG           | <i>cnl</i> | 21.56   | 39.18   | No Ct  | No Ct  | No Ct  | 38.76  | No Ct  | No Ct  | No Ct   | ND     | No Ct   | ND     | 17.6      |          |
| PMB2540 | NG           | B             | <i>cnl</i> | 19.56   | 34.16   | No Ct  | 20.72  | No Ct  | No Ct  | No Ct  | No Ct  | 30.58   | 36     | No Ct   | ND     | 14.6      |          |
| PMB1255 | NG           | NGG           | <i>cnl</i> | 19.64   | No Ct   | No Ct  | 33.87  | No Ct  | No Ct  | No Ct  | No Ct  | No Ct   | ND     | No Ct   | ND     | NA        | 14.2     |
| PMB439  | NG           | NGG           | <i>cnl</i> | 20.11   | No Ct   | No Ct  | No Ct  | No Ct  | No Ct  | No Ct  | No Ct  | No Ct   | ND     | No Ct   | ND     | NA        |          |
| PMB3085 | NG           | NGG           | <i>cnl</i> | 19.21   | No Ct   | No Ct  | No Ct  | No Ct  | No Ct  | No Ct  | No Ct  | 38.07   | ND     | No Ct   | ND     | NA        |          |
| PMB971  | NG           | NGG           | <i>cnl</i> | 19.75   | No Ct   | No Ct  | No Ct  | No Ct  | No Ct  | No Ct  | No Ct  | No Ct   | ND     | No Ct   | ND     | NA        |          |
| PMB1680 | NG           | NGG           | <i>cnl</i> | 24.50   | No Ct   | No Ct  | No Ct  | No Ct  | No Ct  | No Ct  | No Ct  | No Ct   | ND     | No Ct   | ND     | NA        |          |
| PMB3220 | NG           | NGG           | <i>cnl</i> | 19.98   | No Ct   | No Ct  | No Ct  | No Ct  | No Ct  | No Ct  | No Ct  | 38.6    | ND     | No Ct   | ND     | NA        |          |
| PMB2252 | NG           | NGG           | <i>cnl</i> | 18.42   | No Ct   | No Ct  | No Ct  | No Ct  | No Ct  | No Ct  | No Ct  | No Ct   | ND     | No Ct   | ND     | NA        |          |
| PMB3280 | NG           | NGG           | <i>cnl</i> | 24.09   | 32.83   | No Ct  | 38.65  | No Ct  | No Ct  | No Ct  | No Ct  | No Ct   | ND     | No Ct   | ND     | 8.7       |          |
| PMB2080 | NG           | NGG           | <i>cnl</i> | 22.00   | 33.83   | No Ct  | 32.86  | No Ct  | No Ct  | No Ct  | No Ct  | No Ct   | ND     | No Ct   | ND     | 11.8      | 10.9     |
| PMB976  | NG           | NGG           | <i>cnl</i> | 21.14   | No Ct   | No Ct  | No Ct  | No Ct  | No Ct  | No Ct  | No Ct  | 37.53   | No Ct  | No Ct   | ND     | NA        |          |
| PMB1197 | NG           | NGG           | <i>cnl</i> | 21.72   | 33.54   | No Ct  | No Ct  | No Ct  | No Ct  | No Ct  | No Ct  | 33.48   | No Ct  | No Ct   | ND     | 11.8      | 11.8     |
| PMB1980 | NG           | NGG           | <i>cnl</i> | 18.67   | 26.18   | No Ct  | 39.18  | No Ct  | No Ct  | No Ct  | No Ct  | No Ct   | ND     | No Ct   | ND     | 7.5       |          |
| PMB1484 | NG           | NGG           | <i>cnl</i> | 19.78   | 30.26   | No Ct  | No Ct  | No Ct  | No Ct  | No Ct  | No Ct  | 38.35   | No Ct  | No Ct   | ND     | 10.5      |          |
| PMB3289 | NG           | NGG           | <i>cnl</i> | 17.52   | 32.88   | No Ct  | No Ct  | No Ct  | No Ct  | No Ct  | No Ct  | 30.12   | ND     | No Ct   | ND     | 15.4      | 12.6     |
| PMB2108 | NG           | NGG           | <i>cnl</i> | 20.09   | 31.69   | No Ct  | No Ct  | No Ct  | 38.55  | No Ct  | No Ct  | No Ct   | ND     | No Ct   | ND     | 11.6      |          |
| PMB1218 | NG           | NGG           | <i>cnl</i> | 18.53   | No Ct   | No Ct  | No Ct  | No Ct  | No Ct  | No Ct  | No Ct  | No Ct   | ND     | No Ct   | ND     | NA        |          |
| PMB2332 | NG           | NGG           | <i>cnl</i> | 19.65   | No Ct   | No Ct  | No Ct  | No Ct  | No Ct  | No Ct  | No Ct  | No Ct   | ND     | No Ct   | ND     | NA        |          |
| PMB2793 | NG           | NGG           | <i>cnl</i> | 20.49   | 36.02   | No Ct  | 39.37  | No Ct  | 37.72  | No Ct  | No Ct  | No Ct   | ND     | No Ct   | ND     | 15.5      |          |
| PMB1750 | NG           | NGG           | <i>cnl</i> | 23.49   | 34.30   | No Ct  | 33.72  | No Ct  | No Ct  | No Ct  | No Ct  | No Ct   | ND     | No Ct   | ND     | 10.8      | 10.2     |

| Strain  | Group (SASG) | GGroup rt-PCR | cnl PCR       | porA Ct | ctrA Ct | NmA Ct | NmB Ct | NmC Ct | NmW Ct | NmX Ct | NmY Ct | NmE Ct* | NmE Ct | NmZ Ct* | NmZ Ct | porA -ctrA | Delta Ct |
|---------|--------------|---------------|---------------|---------|---------|--------|--------|--------|--------|--------|--------|---------|--------|---------|--------|------------|----------|
| PMB3519 | NG           | NGG           | <i>cnl</i>    | 21.42   | 32.31   | No Ct  | 38.44  | No Ct  | No Ct  | No Ct  | 37.82  | 30.65   | ND     | No Ct   | ND     | 10.9       | 9.2      |
| PMB1383 | NG           | NGG           | <i>cnl</i>    | 22.26   | 32.75   | No Ct  | 32.08  | 37.45  | No Ct  | No Ct  | No Ct  | 36.8    | ND     | No Ct   | ND     | 10.5       | 9.8      |
| PMB347  | NG           | B             | <i>cnl</i>    | 26.08   | 30.15   | No Ct  | 29.47  | No Ct  | No Ct  | No Ct  | No Ct  | No Ct   | ND     | No Ct   | ND     | 4.1        |          |
| PMB2708 | NG           | NGG           | <i>cnl</i>    | 21.62   | 26.38   | No Ct  | 39.29  | No Ct  | No Ct  | No Ct  | No Ct  | No Ct   | ND     | No Ct   | ND     | 4.8        |          |
| PMB1353 | NG           | NGG           | <i>cnl</i>    | 20.69   | 30.62   | No Ct  | No Ct  | No Ct  | 36.15  | No Ct  | No Ct  | 37.74   | ND     | 37.55   | ND     | 9.9        |          |
| PMB2285 | NG           | NGG           | <i>cnl</i>    | 21.36   | 30.80   | No Ct  | No Ct  | No Ct  | No Ct  | No Ct  | No Ct  | No Ct   | ND     | No Ct   | ND     | 9.4        |          |
| PMB3162 | NG           | NGG           | <i>cnl</i>    | 21.03   | 28.65   | No Ct  | No Ct  | No Ct  | No Ct  | No Ct  | No Ct  | No Ct   | ND     | No Ct   | ND     | 7.6        |          |
| PMB1141 | NG           | C             |               | 13.95   | 29.30   | No Ct  | 33.86  | 22.04  | No Ct  | No Ct  | No Ct  | 38.68   | ND     | No Ct   | ND     | 15.4       | 8.1      |
| PMB1946 | NG           | NGG           | <i>cnl</i>    | 21.35   | 31.10   | No Ct  | No Ct  | No Ct  | No Ct  | No Ct  | No Ct  | 37.52   | ND     | No Ct   | ND     | 9.7        |          |
| PMB242  | NG           | NGG           | ND            | 19.32   | No Ct   | No Ct  | No Ct  | No Ct  | No Ct  | No Ct  | No Ct  | 35.15   | No Ct  | No Ct   | No Ct  | NA         |          |
| PMB1104 | Y            | NGG           | ND            | 22.31   | 22.20   | No Ct  | No Ct  | No Ct  | No Ct  | No Ct  | 32.67  | No Ct   | ND     | No Ct   | ND     | 0.1        | 10.4     |
| PMB1741 | NG           | B             | ND            | 17.65   | No Ct   | No Ct  | 16.44  | No Ct  | No Ct  | 32.59  | No Ct  | No Ct   | ND     | No Ct   | ND     | NA         | 14.9     |
| PMB1088 | W            | NGG           | ND            | 18.79   | 31.71   | No Ct  | No Ct  | No Ct  | No Ct  | No Ct  | No Ct  | No Ct   | ND     | No Ct   | ND     | 12.9       |          |
| PMB3642 | B            | NGG           | ND            | 17.92   | 24.59   | No Ct  | 36     | No Ct  | 30.87  | No Ct  | No Ct  | 38.56   | ND     | No Ct   | ND     | 6.7        | 13.0     |
| PMB968  | NG           | B             | No <i>cnl</i> | 21.67   | 32.42   | No Ct  | 17.37  | No Ct  | No Ct  | No Ct  | No Ct  | No Ct   | ND     | No Ct   | ND     | 10.7       |          |
| PMB1567 | NG           | NGG           | NR            | 20.55   | No Ct   | No Ct  | No Ct  | No Ct  | No Ct  | No Ct  | No Ct  | No Ct   | ND     | No Ct   | ND     | NA         |          |
| PMB2616 | NG           | NGG           | NR            | 15.39   | 15.48   | No Ct  | 35.12  | 37.12  | No Ct  | No Ct  | No Ct  | 33.77   | ND     | No Ct   | ND     | 0.1        | 18.4     |
| PMB1934 | NG           | NGG           | NR            | 22.18   | 21.22   | No Ct  | 32.69  | 38.24  | No Ct  | No Ct  | No Ct  | 34.79   | ND     | No Ct   | ND     | 1.0        | 10.5     |
| PMB419  | NG           | NGG           | NR            | 20.22   | 22.58   | No Ct  | No Ct  | No Ct  | No Ct  | No Ct  | No Ct  | No Ct   | ND     | No Ct   | ND     | 2.4        |          |
| PMB2638 | NG           | NGG           | NR            | 19.49   | 19.20   | No Ct  | No Ct  | 33     | No Ct  | No Ct  | No Ct  | No Ct   | ND     | No Ct   | ND     | 0.3        | 13.5     |
| PMB804  | NG           | NGG           | NR            | 18.79   | No Ct   | No Ct  | No Ct  | No Ct  | No Ct  | No Ct  | No Ct  | No Ct   | ND     | No Ct   | ND     | NA         |          |
| PMB312  | NG           | NGG           | NR            | 18.81   | 33.17   | No Ct  | No Ct  | No Ct  | No Ct  | No Ct  | No Ct  | 38.64   | ND     | No Ct   | ND     | 14.4       |          |
| PMB3474 | NG           | NGG           | NR            | 18.77   | 18.80   | No Ct  | No Ct  | No Ct  | No Ct  | No Ct  | No Ct  | No Ct   | ND     | No Ct   | ND     | 0.0        |          |
| PMB2759 | NG           | NGG           | NR            | 20.84   | 20.73   | No Ct  | No Ct  | No Ct  | No Ct  | No Ct  | No Ct  | 37.39   | No Ct  | No Ct   | ND     | 0.1        |          |
| PMB2084 | NG           | NGG           | NR            | 18.13   | No Ct   | No Ct  | No Ct  | No Ct  | No Ct  | No Ct  | No Ct  | 37.74   | ND     | No Ct   | ND     | NA         |          |
| PMB1668 | NG           | NGG           | NR            | 23.65   | 39.11   | No Ct  | No Ct  | No Ct  | 38.66  | No Ct  | No Ct  | No Ct   | ND     | No Ct   | ND     | 15.5       |          |
| PMB2581 | NG           | NGG           | NR            | 22.37   | 21.62   | No Ct  | 36.22  | No Ct  | No Ct  | No Ct  | No Ct  | No Ct   | ND     | No Ct   | ND     | 0.8        |          |
| PMB1990 | NG           | E             |               | 19.32   | 20.84   | No Ct  | No Ct  | No Ct  | 39.53  | No Ct  | No Ct  | No Ct   | 18.12  | No Ct   | ND     | 1.5        |          |
| PMB3412 | NG           | NGG           | NR            | 24.33   | 24.16   | No Ct  | No Ct  | No Ct  | No Ct  | No Ct  | No Ct  | No Ct   | ND     | No Ct   | ND     | 0.2        |          |

| Strain  | Group (SASG) | GGroup rt-PCR | cnl PCR | porA Ct | ctrA Ct | NmA Ct | NmB Ct | NmC Ct | NmW Ct | NmX Ct | NmY Ct | NmE Ct* | NmE Ct | NmZ Ct* | NmZ Ct | porA -ctrA | Delta Ct |
|---------|--------------|---------------|---------|---------|---------|--------|--------|--------|--------|--------|--------|---------|--------|---------|--------|------------|----------|
| PMB460  | NG           | NGG           | NR      | 20.72   | 20.83   | No Ct  | No Ct  | No Ct  | No Ct  | No Ct  | No Ct  | No Ct   | ND     | No Ct   | ND     | 0.1        |          |
| PMB2548 | NG           | Y             |         | 20.40   | 20.45   | No Ct  | 37.24  | No Ct  | No Ct  | No Ct  | 28.8   | 35.07   | ND     | No Ct   | ND     | 0.1        |          |
| PMB1781 | NG           | NGG           | NR      | 22.47   | 32.37   | No Ct  | 38.21  | 39.41  | No Ct  | No Ct  | No Ct  | No Ct   | ND     | No Ct   | ND     | 9.9        |          |
| PMB2574 | NG           | NGG           | NR      | 18.87   | 18.62   | No Ct  | 32.95  | No Ct  | No Ct  | No Ct  | No Ct  | No Ct   | ND     | No Ct   | ND     | 0.2        | 14.1     |
| PMB3507 | NG           | Y             |         | 24.96   | 24.65   | No Ct  | No Ct  | No Ct  | No Ct  | No Ct  | 26.1   | No Ct   | ND     | No Ct   | ND     | 0.3        |          |
| PMB1155 | B            | B             |         | 16.99   | 16.49   | No Ct  | 15.66  | No Ct  | No Ct  | No Ct  | No Ct  | No Ct   | ND     | No Ct   | ND     | 0.5        |          |
| PMB473  | B            | B             |         | 21.82   | 21.66   | No Ct  | 22.91  | No Ct  | No Ct  | No Ct  | No Ct  | No Ct   | ND     | No Ct   | ND     | 0.2        |          |
| PMB3509 | B            | B             |         | 24.91   | 24.75   | No Ct  | 30.65  | No Ct  | No Ct  | No Ct  | No Ct  | No Ct   | ND     | No Ct   | ND     | 0.2        | 5.7      |
| PMB1827 | NG           | Y             |         | 26.90   | 26.84   | No Ct  | No Ct  | No Ct  | No Ct  | No Ct  | 29.09  | No Ct   | ND     | No Ct   | ND     | 0.1        |          |
| PMB2333 | B            | B             |         | 18.93   | 19.00   | No Ct  | 18.89  | No Ct  | No Ct  | No Ct  | No Ct  | 36.42   | No Ct  | No Ct   | No Ct  | 0.1        |          |
| PMB724  | B            | B             |         | 22.24   | 21.70   | No Ct  | 23.26  | No Ct  | No Ct  | No Ct  | No Ct  | No Ct   | ND     | No Ct   | ND     | 0.5        |          |
| PMB3011 | X            | B             |         | 19.25   | 18.88   | No Ct  | 18.66  | No Ct  | No Ct  | No Ct  | No Ct  | No Ct   | ND     | No Ct   | ND     | 0.4        |          |
| PMB2061 | B            | B             |         | 21.75   | 21.70   | No Ct  | 20.74  | No Ct  | No Ct  | No Ct  | No Ct  | No Ct   | ND     | No Ct   | ND     | 0.1        |          |
| PMB2338 | W            | W             |         | 15.72   | 14.96   | No Ct  | 36.67  | No Ct  | 14.12  | No Ct  | 28.3   | No Ct   | ND     | No Ct   | ND     | 0.8        | 12.6     |
| PMB1821 | NG           | Y             |         | 19.98   | 19.86   | No Ct  | No Ct  | No Ct  | No Ct  | No Ct  | 21.23  | No Ct   | ND     | No Ct   | ND     | 0.1        |          |
| PMB3147 | B            | B             |         | 15.57   | 15.26   | No Ct  | 15.37  | No Ct  | No Ct  | No Ct  | No Ct  | No Ct   | ND     | No Ct   | ND     | 0.3        |          |
| PMB676  | B            | B             |         | 15.90   | 15.56   | No Ct  | 15.55  | No Ct  | No Ct  | No Ct  | No Ct  | No Ct   | ND     | No Ct   | ND     | 0.3        |          |
| PMB1742 | B            | B             |         | 16.35   | 16.31   | No Ct  | 16.83  | No Ct  | No Ct  | No Ct  | No Ct  | No Ct   | ND     | No Ct   | ND     | 0.0        |          |
| PMB1358 | NG           | C             |         | 19.36   | 19.04   | No Ct  | No Ct  | 19.86  | No Ct  | No Ct  | No Ct  | No Ct   | ND     | 38.91   | ND     | 0.3        |          |
| PMB2109 | NG           | B             |         | 17.49   | 17.33   | No Ct  | 17.32  | No Ct  | No Ct  | No Ct  | No Ct  | No Ct   | ND     | No Ct   | ND     | 0.2        |          |
| PMB2659 | NG           | B             |         | 19.10   | 18.82   | No Ct  | 18.61  | No Ct  | No Ct  | No Ct  | No Ct  | No Ct   | ND     | No Ct   | ND     | 0.3        |          |
| PMB2758 | B            | B             |         | 15.00   | 14.97   | No Ct  | 15.5   | No Ct  | No Ct  | No Ct  | No Ct  | No Ct   | ND     | No Ct   | ND     | 0.0        |          |
| PMB248  | NG           | B             |         | 19.64   | 19.44   | No Ct  | 19.76  | No Ct  | No Ct  | No Ct  | No Ct  | No Ct   | ND     | No Ct   | ND     | 0.2        |          |
| PMB3399 | NG           | Y             |         | 16.78   | 16.96   | No Ct  | 35.73  | No Ct  | 37.35  | No Ct  | 18.03  | No Ct   | ND     | No Ct   | ND     | 0.2        |          |
| PMB1465 | NG           | W             |         | 14.27   | 14.71   | No Ct  | 36.06  | No Ct  | 18.04  | 37.25  | No Ct  | No Ct   | ND     | No Ct   | ND     | 0.4        |          |
| PMB1132 | NG           | W             |         | 22.78   | 22.54   | No Ct  | No Ct  | 39.38  | 20.62  | No Ct  | No Ct  | No Ct   | ND     | No Ct   | ND     | 0.2        |          |
| PMB2091 | B            | B             |         | 15.61   | 15.49   | No Ct  | 15.16  | No Ct  | No Ct  | No Ct  | No Ct  | No Ct   | ND     | No Ct   | ND     | 0.1        |          |
| PMB3397 | Y            | Y             |         | 21.25   | 21.06   | No Ct  | 33.76  | No Ct  | No Ct  | No Ct  | 22.71  | No Ct   | ND     | No Ct   | ND     | 0.2        | 12.5     |
| PMB1971 | B            | B             |         | 18.15   | 17.77   | No Ct  | 16.97  | No Ct  | No Ct  | No Ct  | No Ct  | No Ct   | ND     | No Ct   | ND     | 0.4        |          |

| Strain  | Group (SASG) | GGroup rt-PCR | cnl PCR | porA Ct | ctrA Ct | NmA Ct | NmB Ct | NmC Ct | NmW Ct | NmX Ct | NmY Ct | NmE Ct* | NmE Ct | NmZ Ct* | NmZ Ct | porA -ctrA | Delta Ct |
|---------|--------------|---------------|---------|---------|---------|--------|--------|--------|--------|--------|--------|---------|--------|---------|--------|------------|----------|
| PMB3076 | NG           | B             |         | 25.34   | 24.94   | No Ct  | 18.04  | No Ct  | No Ct  | No Ct  | No Ct  | No Ct   | ND     | No Ct   | ND     | 0.4        |          |
| PMB3307 | NG           | B             |         | 14.10   | 23.74   | No Ct  | 19.4   | 38.06  | No Ct  | No Ct  | No Ct  | No Ct   | ND     | No Ct   | ND     | 9.6        |          |
| PMB2884 | NG           | Y             |         | 20.42   | 20.16   | No Ct  | 36.86  | No Ct  | No Ct  | No Ct  | 17.2   | No Ct   | ND     | No Ct   | ND     | 0.3        |          |
| PMB3057 | NG           | E             |         | 20.64   | 22.73   | No Ct  | 28.14  | No Ct  | No Ct  | No Ct  | No Ct  | 16.89   | 14.21  | No Ct   | ND     | 2.1        | 7.5      |
| PMB2947 | B            | B             |         | 15.74   | 15.70   | No Ct  | 14.89  | No Ct  | No Ct  | No Ct  | No Ct  | 34.05   | ND     | No Ct   | ND     | 0.0        | 18.3     |
| PMB1078 | NG           | B             |         | 21.12   | 20.71   | No Ct  | 18.05  | No Ct  | No Ct  | No Ct  | No Ct  | No Ct   | ND     | No Ct   | ND     | 0.4        |          |
| PMB818  | E            | E             |         | 17.01   | 16.77   | No Ct  | 31.57  | No Ct  | No Ct  | No Ct  | No Ct  | 16.68   | 28.88  | No Ct   | ND     | 0.2        | 14.6     |
| PMB2456 | NG           | E             |         | 23.38   | 25.42   | No Ct  | No Ct  | No Ct  | No Ct  | No Ct  | No Ct  | 20.45   | 19     | No Ct   | ND     | 2.0        |          |
| PMB2113 | B            | B             |         | 16.18   | 15.65   | No Ct  | 15.33  | No Ct  | No Ct  | No Ct  | No Ct  | No Ct   | ND     | No Ct   | ND     | 0.5        |          |
| PMB1595 | B            | B             |         | 17.28   | 16.93   | No Ct  | 16.29  | No Ct  | No Ct  | 35.88  | No Ct  | No Ct   | ND     | No Ct   | ND     | 0.3        |          |
| PMB620  | NG           | Y             |         | 20.52   | 20.06   | No Ct  | 39     | No Ct  | No Ct  | No Ct  | 18.03  | No Ct   | ND     | No Ct   | ND     | 0.5        |          |
| PMB1075 | NG           | E             |         | 27.10   | 29.02   | No Ct  | No Ct  | No Ct  | No Ct  | No Ct  | No Ct  | 19.74   | 18.28  | No Ct   | ND     | 1.9        | 7.4      |
| PMB203  | C            | C             |         | 15.56   | 15.34   | No Ct  | No Ct  | 14.32  | No Ct  | No Ct  | No Ct  | No Ct   | ND     | No Ct   | ND     | 0.2        |          |
| PMB2807 | B            | B             |         | 18.03   | 18.27   | No Ct  | 16.81  | No Ct  | No Ct  | No Ct  | No Ct  | No Ct   | ND     | No Ct   | ND     | 0.2        |          |
| PMB35   | NG           | E             |         | 21.14   | 21.09   | No Ct  | No Ct  | No Ct  | 29.89  | No Ct  | No Ct  | 18.93   | 14.45  | No Ct   | ND     | 0.1        | 8.7      |
| PMB1928 | NG           | C             |         | 18.22   | 20.07   | No Ct  | No Ct  | 22.94  | No Ct  | No Ct  | No Ct  | No Ct   | ND     | No Ct   | ND     | 1.8        |          |
| PMB675  | W            | W             |         | 18.45   | 17.96   | No Ct  | No Ct  | No Ct  | 17.98  | No Ct  | No Ct  | No Ct   | ND     | No Ct   | ND     | 0.5        |          |
| PMB2072 | NG           | W             |         | 20.52   | 20.15   | No Ct  | No Ct  | No Ct  | 16.79  | No Ct  | No Ct  | No Ct   | ND     | No Ct   | ND     | 0.4        |          |
| PMB2913 | NG           | C             |         | 17.98   | 18.69   | No Ct  | No Ct  | 19     | No Ct  | No Ct  | No Ct  | No Ct   | ND     | No Ct   | ND     | 0.7        |          |
| PMB3    | NG           | Y             |         | 17.85   | 17.71   | No Ct  | No Ct  | No Ct  | No Ct  | No Ct  | 18.16  | No Ct   | ND     | No Ct   | ND     | 0.1        |          |
| PMB2344 | NG           | B             |         | 20.35   | 20.42   | No Ct  | 18     | No Ct  | No Ct  | No Ct  | No Ct  | No Ct   | ND     | No Ct   | ND     | 0.1        |          |
| PMB2881 | NG           | C             |         | 20.14   | 20.03   | No Ct  | No Ct  | 16     | No Ct  | No Ct  | No Ct  | No Ct   | ND     | No Ct   | ND     | 0.1        | 4.1      |
| PMB1749 | NG           | B             |         | 18.69   | 18.89   | No Ct  | 20     | No Ct  | No Ct  | No Ct  | No Ct  | No Ct   | ND     | No Ct   | ND     | 0.2        | 1.3      |
| PMB103  | NG           | C             |         | 18.28   | 17.87   | No Ct  | No Ct  | 18     | No Ct  | No Ct  | No Ct  | 34.78   | ND     | No Ct   | ND     | 0.4        | 16.5     |
| PMB1024 | NG           | B             |         | 20.22   | 19.93   | No Ct  | 21     | No Ct  | No Ct  | No Ct  | No Ct  | No Ct   | ND     | No Ct   | ND     | 0.3        | 0.8      |
| PMB1858 | NG           | B             |         | 18.17   | 18.01   | No Ct  | 19     | No Ct  | No Ct  | No Ct  | No Ct  | No Ct   | ND     | No Ct   | ND     | 0.2        | 0.8      |
| PMB3380 | NG           | W             |         | 21.33   | 20.98   | No Ct  | No Ct  | No Ct  | 18.7   | No Ct  | No Ct  | No Ct   | ND     | No Ct   | ND     | 0.3        | 2.6      |
| PMB3176 | B            | B             |         | 17.32   | 17.11   | No Ct  | 16.17  | No Ct  | No Ct  | No Ct  | No Ct  | 32.49   | ND     | No Ct   | ND     | 0.2        | 15.2     |
| PMB1340 | NG           | C             |         | 18.17   | 18.29   | No Ct  | No Ct  | 18     | No Ct  | No Ct  | No Ct  | No Ct   | ND     | No Ct   | ND     | 0.1        |          |

| Strain  | Group (SASG) | GGroup rt-PCR | cnl PCR | porA Ct | ctrA Ct | NmA Ct | NmB Ct | NmC Ct | NmW Ct | NmX Ct | NmY Ct | NmE Ct* | NmE Ct | NmZ Ct* | NmZ Ct | porA -ctrA | Delta Ct |
|---------|--------------|---------------|---------|---------|---------|--------|--------|--------|--------|--------|--------|---------|--------|---------|--------|------------|----------|
| PMB2238 | NG           | Y             |         | 20.72   | 20.41   | No Ct  | No Ct  | No Ct  | No Ct  | No Ct  | 17.78  | No Ct   | ND     | No Ct   | ND     | 0.3        |          |
| PMB1642 | B            | B             |         | 17.35   | 19.88   | No Ct  | 15.64  | No Ct  | No Ct  | No Ct  | No Ct  | 37.11   | ND     | No Ct   | ND     | 2.5        |          |
| PMB6    | NG           | W             |         | 20.60   | 20.36   | No Ct  | No Ct  | No Ct  | 19.32  | No Ct  | No Ct  | No Ct   | ND     | No Ct   | ND     | 0.2        |          |
| PMB2811 | NG           | W             |         | 20.69   | 20.11   | No Ct  | No Ct  | No Ct  | 21.52  | No Ct  | No Ct  | No Ct   | ND     | No Ct   | ND     | 0.6        |          |
| PMB2630 | NG           | B             |         | 18.15   | 18.18   | No Ct  | 19     | No Ct  | No Ct  | No Ct  | No Ct  | No Ct   | ND     | No Ct   | ND     | 0.0        |          |
| PMB1779 | NG           | Y             |         | 19.75   | 19.84   | No Ct  | No Ct  | No Ct  | 38.45  | No Ct  | 17.76  | No Ct   | ND     | No Ct   | ND     | 0.1        |          |
| PMB607  | B            | B             |         | 16.95   | 17.05   | No Ct  | 15.50  | No Ct  | No Ct  | 32.33  | No Ct  | No Ct   | ND     | No Ct   | ND     | 0.1        | 15.4     |
| PMB3563 | NG           | E             |         | 19.88   | 19.83   | No Ct  | 36.00  | No Ct  | No Ct  | No Ct  | No Ct  | 20.24   | 17.43  | No Ct   | ND     | 0.1        |          |
| PMB2853 | W            | W             |         | 15.57   | 15.54   | No Ct  | No Ct  | No Ct  | 15.65  | No Ct  | No Ct  | No Ct   | ND     | No Ct   | ND     | 0.0        |          |
| PMB628  | NG           | Y             |         | 21.58   | 21.15   | No Ct  | No Ct  | No Ct  | No Ct  | No Ct  | 21     | No Ct   | ND     | No Ct   | ND     | 0.4        |          |
| PMB847  | B            | B             |         | 15.68   | 15.40   | No Ct  | 15.64  | No Ct  | No Ct  | No Ct  | No Ct  | No Ct   | ND     | No Ct   | ND     | 0.3        |          |
| PMB1250 | B            | B             |         | 15.06   | 15.00   | No Ct  | 15.21  | No Ct  | No Ct  | No Ct  | No Ct  | No Ct   | ND     | No Ct   | ND     | 0.1        |          |
| PMB442  | Y            | W/Y           |         | 23.46   | 23.23   | No Ct  | No Ct  | No Ct  | 25.68  | No Ct  | 28.24  | No Ct   | ND     | No Ct   | ND     | 0.2        | 4.8      |
| PMB2661 | NG           | C             |         | 18.43   | 18.02   | No Ct  | No Ct  | 17     | No Ct  | No Ct  | No Ct  | No Ct   | ND     | No Ct   | ND     | 0.4        |          |
| PMB2236 | B            | B             |         | 15.53   | 15.61   | No Ct  | 15.97  | No Ct  | No Ct  | No Ct  | No Ct  | No Ct   | ND     | No Ct   | ND     | 0.1        |          |
| PMB3707 | B            | B             |         | 19.03   | 17.33   | No Ct  | 18.28  | No Ct  | No Ct  | No Ct  | No Ct  | No Ct   | ND     | No Ct   | ND     | 1.7        |          |
| PMB2647 | NG           | B             |         | 20.05   | 20.01   | No Ct  | 19.78  | No Ct  | No Ct  | No Ct  | No Ct  | No Ct   | ND     | No Ct   | ND     | 0.0        |          |
| PMB1933 | B            | B             |         | 16.91   | 16.46   | No Ct  | 16.65  | No Ct  | No Ct  | No Ct  | No Ct  | No Ct   | ND     | No Ct   | ND     | 0.4        |          |
| PMB1491 | NG           | B             |         | 19.54   | 19.07   | No Ct  | 19.55  | No Ct  | No Ct  | No Ct  | No Ct  | No Ct   | ND     | No Ct   | ND     | 0.5        |          |
| PMB3306 | NG           | B             |         | 21.03   | 21.03   | No Ct  | 21.08  | No Ct  | No Ct  | No Ct  | No Ct  | 38.23   | ND     | No Ct   | ND     | 0.0        |          |
| PMB3646 | B            | B             |         | 15.87   | 15.83   | No Ct  | 15.04  | No Ct  | No Ct  | No Ct  | No Ct  | No Ct   | ND     | No Ct   | ND     | 0.0        |          |
| PMB2877 | NG           | Y             |         | 22.43   | 22.31   | No Ct  | No Ct  | No Ct  | No Ct  | No Ct  | 21.03  | No Ct   | ND     | No Ct   | ND     | 0.1        |          |
| PMB1190 | NG           | Y             |         | 23.12   | 22.81   | No Ct  | No Ct  | No Ct  | No Ct  | No Ct  | 22.17  | No Ct   | ND     | No Ct   | ND     | 0.3        |          |
| PMB472  | NG           | W             |         | 21.77   | 21.19   | No Ct  | No Ct  | No Ct  | 19.83  | No Ct  | No Ct  | 38.2    | ND     | No Ct   | ND     | 0.6        |          |
| PMB3083 | NG           | Z             |         | 22.04   | 22.02   | No Ct  | 37.76  | No Ct  | No Ct  | No Ct  | No Ct  | 37.41   | No Ct  | 19.54   | 15.81  | 0.0        |          |
| PMB513  | B            | B             |         | 15.74   | 15.62   | No Ct  | 15.02  | No Ct  | No Ct  | No Ct  | No Ct  | No Ct   | ND     | No Ct   | ND     | 0.1        |          |
| PMB229  | Y            | Y             |         | 23.02   | 22.62   | No Ct  | No Ct  | No Ct  | No Ct  | No Ct  | 24.53  | No Ct   | ND     | No Ct   | ND     | 0.4        |          |
| PMB3437 | W            | W             |         | 16.09   | 15.84   | No Ct  | No Ct  | No Ct  | 15.7   | No Ct  | No Ct  | No Ct   | ND     | No Ct   | ND     | 0.2        |          |
| PMB2167 | B            | B             |         | 16.44   | 16.56   | No Ct  | 16.33  | No Ct  | No Ct  | No Ct  | No Ct  | No Ct   | ND     | No Ct   | ND     | 0.1        |          |

| Strain  | Group (SASG) | GGroup rt-PCR | cnl PCR | porA Ct | ctrA Ct | NmA Ct | NmB Ct | NmC Ct | NmW Ct | NmX Ct | NmY Ct | NmE Ct* | NmE Ct | NmZ Ct* | NmZ Ct | porA -ctrA | Delta Ct |
|---------|--------------|---------------|---------|---------|---------|--------|--------|--------|--------|--------|--------|---------|--------|---------|--------|------------|----------|
| PMB3145 | NG           | X             |         | 23.92   | 23.72   | No Ct  | No Ct  | No Ct  | No Ct  | 25.19  | No Ct  | No Ct   | ND     | No Ct   | ND     | 0.2        |          |
| PMB2593 | NG           | B             |         | 22.74   | 22.48   | No Ct  | 19.72  | No Ct  | No Ct  | 38.51  | No Ct  | 38.35   | ND     | No Ct   | ND     | 0.3        |          |
| PMB1394 | B            | B             |         | 14.56   | 14.82   | No Ct  | 15.26  | No Ct  | No Ct  | No Ct  | No Ct  | No Ct   | ND     | No Ct   | ND     | 0.3        |          |
| PMB2977 | B            | B             |         | 16.21   | 16.06   | No Ct  | 16.23  | No Ct  | No Ct  | No Ct  | No Ct  | No Ct   | ND     | No Ct   | ND     | 0.2        |          |
| PMB2025 | NG           | B             |         | 23.76   | 23.27   | No Ct  | 21.98  | No Ct  | No Ct  | No Ct  | No Ct  | No Ct   | ND     | No Ct   | ND     | 0.5        |          |
| PMB1790 | B            | B             |         | 15.52   | 15.56   | No Ct  | 15.54  | No Ct  | No Ct  | No Ct  | No Ct  | No Ct   | ND     | No Ct   | ND     | 0.0        |          |
| PMB2138 | NG           | B             |         | 23.21   | 23.03   | No Ct  | 20.92  | No Ct  | No Ct  | No Ct  | No Ct  | No Ct   | ND     | No Ct   | ND     | 0.2        |          |
| PMB3659 | W            | W             |         | 16.07   | 15.84   | No Ct  | No Ct  | No Ct  | 16.13  | No Ct  | No Ct  | No Ct   | ND     | No Ct   | ND     | 0.2        |          |
| PMB542  | NG           | B             |         | 20.45   | 20.03   | No Ct  | 21.27  | No Ct  | No Ct  | No Ct  | No Ct  | No Ct   | ND     | No Ct   | ND     | 0.4        |          |
| PMB3405 | NG           | W             |         | 18.84   | 18.47   | No Ct  | No Ct  | No Ct  | 19.06  | No Ct  | No Ct  | No Ct   | ND     | No Ct   | ND     | 0.4        |          |
| PMB2016 | NG           | W             |         | 16.77   | 17.62   | No Ct  | No Ct  | No Ct  | 18.73  | No Ct  | No Ct  | 37.43   | ND     | No Ct   | ND     | 0.8        |          |
| PMB1806 | NG           | W             |         | 19.12   | 19.04   | No Ct  | No Ct  | No Ct  | 20.05  | 39.78  | No Ct  | No Ct   | ND     | No Ct   | ND     | 0.1        |          |
| PMB318  | X            | X             |         | 15.10   | 15.07   | No Ct  | 36.22  | No Ct  | No Ct  | 15.96  | No Ct  | No Ct   | ND     | No Ct   | ND     | 0.0        |          |
| PMB1736 | X            | Y             |         | 17.28   | 16.14   | No Ct  | 36.24  | No Ct  | No Ct  | No Ct  | 17.00  | No Ct   | ND     | No Ct   | ND     | 1.1        |          |
| PMB3113 | NG           | C             |         | 18.67   | 18.40   | No Ct  | 39.78  | 18.31  | No Ct  | No Ct  | No Ct  | No Ct   | ND     | No Ct   | ND     | 0.3        |          |
| PMB743  | NG           | Y             |         | 17.28   | 17.43   | No Ct  | No Ct  | 37.62  | No Ct  | No Ct  | 18.51  | No Ct   | ND     | No Ct   | ND     | 0.2        |          |
| PMB1442 | NG           | B             |         | 19.51   | 19.46   | No Ct  | 19.77  | No Ct  | No Ct  | No Ct  | No Ct  | No Ct   | ND     | No Ct   | ND     | 0.1        |          |
| PMB2869 | B            | B             |         | 16.81   | 16.95   | No Ct  | 17.23  | 32.30  | No Ct  | No Ct  | 35.17  | 38.94   | ND     | No Ct   | ND     | 0.1        | 15.5     |
| PMB2829 | NG           | B             |         | 19.01   | 18.84   | No Ct  | 18.39  | No Ct  | No Ct  | No Ct  | No Ct  | No Ct   | ND     | No Ct   | ND     | 0.2        |          |
| PMB3235 | B            | B             |         | 15.93   | 15.88   | No Ct  | 16.19  | No Ct  | No Ct  | No Ct  | No Ct  | No Ct   | ND     | No Ct   | ND     | 0.1        |          |
| PMB2293 | Y            | Y             |         | 22.69   | 22.42   | No Ct  | 38.33  | No Ct  | No Ct  | No Ct  | 24.74  | No Ct   | ND     | No Ct   | ND     | 0.3        |          |
| PMB553  | NG           | E             |         | 19.86   | 19.49   | No Ct  | No Ct  | 34     | No Ct  | No Ct  | No Ct  | 19.56   | 18.35  | No Ct   | ND     | 0.4        | 14.1     |
| PMB1570 | B            | B             |         | 16.20   | 15.87   | No Ct  | 15.86  | No Ct  | No Ct  | No Ct  | No Ct  | No Ct   | ND     | No Ct   | ND     | 0.3        |          |
| PMB456  | E            | E             |         | 22.26   | 22.13   | No Ct  | No Ct  | No Ct  | No Ct  | No Ct  | No Ct  | 17.21   | 13.61  | No Ct   | ND     | 0.1        |          |
| PMB3255 | NG           | E             |         | 17.63   | 19.74   | No Ct  | 35.00  | No Ct  | No Ct  | No Ct  | 29     | 16.50   | 15.62  | No Ct   | ND     | 2.1        | 17.4     |
| PMB560  | NG           | C             |         | 20.50   | 20.17   | No Ct  | 30.00  | 19     | No Ct  | No Ct  | No Ct  | No Ct   | ND     | No Ct   | ND     | 0.3        | 9.5      |
| PMB2442 | NG           | B             |         | 19.11   | 19.03   | No Ct  | 19.44  | No Ct  | No Ct  | No Ct  | No Ct  | 29.41   | No Ct  | 37.6    | ND     | 0.1        | 10.3     |
| PMB1983 | B            | B             |         | 15.56   | 15.32   | No Ct  | 15.02  | No Ct  | No Ct  | No Ct  | No Ct  | 38.05   | ND     | No Ct   | ND     | 0.2        |          |
| PMB173  | NG           | E             |         | 22.78   | 22.66   | No Ct  | No Ct  | No Ct  | No Ct  | No Ct  | No Ct  | 20.26   | 18.09  | No Ct   | ND     | 0.1        |          |

| Strain  | Group (SASG) | GGroup rt-PCR | cnl PCR | porA Ct | ctrA Ct | NmA Ct | NmB Ct | NmC Ct | NmW Ct | NmX Ct | NmY Ct | NmE Ct* | NmE Ct | NmZ Ct* | NmZ Ct | porA -ctrA | Delta Ct |
|---------|--------------|---------------|---------|---------|---------|--------|--------|--------|--------|--------|--------|---------|--------|---------|--------|------------|----------|
| PMB2359 | NG           | B             |         | 20.29   | 20.31   | No Ct  | 20.34  | No Ct  | No Ct  | No Ct  | No Ct  | No Ct   | ND     | No Ct   | ND     | 0.0        |          |
| PMB819  | B            | B             |         | 19.79   | 19.48   | No Ct  | 19.26  | No Ct  | No Ct  | No Ct  | No Ct  | No Ct   | ND     | No Ct   | ND     | 0.3        |          |
| PMB3123 | NG           | C             |         | 25.30   | 25.15   | No Ct  | No Ct  | 18     | No Ct  | No Ct  | No Ct  | 29.54   | 37     | No Ct   | ND     | 0.2        | 11.7     |
| PMB3392 | B            | B             |         | 17.11   | 16.76   | No Ct  | 15.65  | No Ct  | No Ct  | No Ct  | No Ct  | No Ct   | ND     | No Ct   | ND     | 0.3        |          |
| PMB2859 | Y            | Y             |         | 22.81   | 22.29   | No Ct  | No Ct  | No Ct  | No Ct  | No Ct  | 24.5   | No Ct   | ND     | No Ct   | ND     | 0.5        |          |
| PMB1501 | NG           | Y             |         | 29.12   | 29.17   | No Ct  | No Ct  | No Ct  | No Ct  | No Ct  | 18.79  | 22.93   | 37     | No Ct   | ND     | 0.0        |          |
| PMB2111 | B            | B             |         | 15.58   | 15.66   | No Ct  | 15.95  | 26.12  | No Ct  | No Ct  | No Ct  | No Ct   | ND     | No Ct   | ND     | 0.1        | 10.5     |
| PMB2999 | C            | C             |         | 14.28   | 14.89   | No Ct  | 33.57  | 14.85  | No Ct  | No Ct  | No Ct  | No Ct   | ND     | No Ct   | ND     | 0.6        | 19.3     |
| PMB843  | W            | W             |         | 15.63   | 19.45   | No Ct  | No Ct  | 33.99  | 20.03  | No Ct  | No Ct  | 38.17   | ND     | No Ct   | ND     | 3.8        | 18.4     |
| PMB557  | W            | W             |         | 16.24   | 15.71   | No Ct  | No Ct  | No Ct  | 15.92  | No Ct  | No Ct  | No Ct   | ND     | No Ct   | ND     | 0.5        |          |
| PMB1799 | B            | B             |         | 15.98   | 16.04   | No Ct  | 15.96  | No Ct  | 35.1   | No Ct  | No Ct  | No Ct   | ND     | No Ct   | ND     | 0.1        |          |
| PMB158  | W            | W             |         | 16.64   | 16.22   | No Ct  | No Ct  | No Ct  | 16.16  | No Ct  | No Ct  | No Ct   | ND     | No Ct   | ND     | 0.4        |          |
| PMB2224 | W            | W             |         | 16.31   | 16.08   | No Ct  | No Ct  | No Ct  | 16.26  | No Ct  | No Ct  | No Ct   | ND     | No Ct   | ND     | 0.2        |          |
| PMB3273 | NG           | B             |         | 17.03   | 17.02   | No Ct  | 16.42  | No Ct  | No Ct  | No Ct  | No Ct  | No Ct   | ND     | No Ct   | ND     | 0.0        |          |
| PMB609  | B            | B             |         | 15.33   | 15.34   | No Ct  | 15.64  | No Ct  | 31.99  | No Ct  | No Ct  | No Ct   | ND     | No Ct   | ND     | 0.0        | 16.7     |
| PMB809  | W            | W             |         | 15.64   | 15.58   | No Ct  | 37.05  | No Ct  | 15.76  | No Ct  | No Ct  | No Ct   | ND     | No Ct   | ND     | 0.1        |          |
| PMB2474 | W            | W             |         | 15.24   | 15.34   | No Ct  | No Ct  | 35.15  | 15.55  | No Ct  | No Ct  | No Ct   | ND     | No Ct   | ND     | 0.1        |          |
| PMB2328 | NG           | B             |         | 19.47   | No Ct   | No Ct  | 19.74  | No Ct  | No Ct  | No Ct  | No Ct  | No Ct   | ND     | No Ct   | ND     | NA         |          |
| PMB2787 | C            | C             |         | 16.01   | 16.20   | No Ct  | 28.8   | 16.45  | 33.44  | No Ct  | No Ct  | No Ct   | ND     | No Ct   | ND     | 0.2        | 17.4     |
| PMB2849 | B            | B             |         | 16.22   | 15.99   | No Ct  | 16.27  | 36.28  | No Ct  | No Ct  | No Ct  | No Ct   | ND     | No Ct   | ND     | 0.2        |          |
| PMB3187 | NG           | B             |         | 20.46   | 20.24   | No Ct  | 20.85  | No Ct  | No Ct  | No Ct  | No Ct  | No Ct   | ND     | No Ct   | ND     | 0.2        |          |
| PMB2617 | NG           | B             |         | 15.82   | 16.19   | No Ct  | 17.32  | 24.8   | No Ct  | No Ct  | No Ct  | No Ct   | ND     | No Ct   | ND     | 0.4        | 9.0      |
| PMB3500 | NG           | Y             |         | 20.38   | 20.24   | No Ct  | 31.20  | 37.66  | No Ct  | No Ct  | 18.6   | No Ct   | ND     | No Ct   | ND     | 0.1        | 10.8     |
| PMB1763 | NG           | C             |         | 20.87   | 20.67   | No Ct  | No Ct  | 18.59  | No Ct  | No Ct  | No Ct  | No Ct   | ND     | No Ct   | ND     | 0.2        |          |
| PMB463  | NG           | Y             |         | 15.03   | 15.13   | No Ct  | 32.29  | 24.84  | 27.79  | No Ct  | 16.47  | 38.58   | ND     | No Ct   | ND     | 0.1        | 17.3     |
| PMB842  | NG           | W             |         | 20.96   | 20.39   | No Ct  | 36.92  | No Ct  | 18.01  | No Ct  | No Ct  | No Ct   | ND     | No Ct   | ND     | 0.6        |          |
| PMB3214 | NG           | Y             |         | 20.36   | 20.52   | No Ct  | 38.26  | No Ct  | No Ct  | No Ct  | 18.57  | No Ct   | ND     | No Ct   | ND     | 0.2        |          |
| PMB397  | NG           | Z             |         | 22.58   | 22.52   | No Ct  | 36.78  | 35.34  | No Ct  | No Ct  | No Ct  | 34.55   | No Ct  | 18.81   | 14.42  | 0.1        | 12.0     |
| PMB608  | NG           | W             |         | 20.21   | 19.73   | No Ct  | 33.23  | 38.18  | 18.02  | No Ct  | No Ct  | No Ct   | ND     | No Ct   | ND     | 0.5        | 13.0     |

| Strain  | Group (SASG) | GGroup rt-PCR | cnl PCR | porA Ct | ctrA Ct | NmA Ct | NmB Ct | NmC Ct | NmW Ct | NmX Ct | NmY Ct | NmE Ct* | NmE Ct | NmZ Ct* | NmZ Ct | porA -ctrA | Delta Ct |
|---------|--------------|---------------|---------|---------|---------|--------|--------|--------|--------|--------|--------|---------|--------|---------|--------|------------|----------|
| PMB1900 | NG           | B             |         | 15.16   | 15.32   | No Ct  | 17.94  | 29.46  | No Ct  | No Ct  | No Ct  | No Ct   | ND     | No Ct   | ND     | 0.2        | 14.3     |
| PMB1016 | NG           | E             |         | 21.23   | 23.43   | No Ct  | No Ct  | 32.91  | 38.96  | No Ct  | No Ct  | 17.54   | 16.42  | No Ct   | ND     | 2.2        | 11.7     |
| PMB3323 | NG           | Y             |         | 20.73   | 20.33   | No Ct  | No Ct  | No Ct  | No Ct  | No Ct  | 18.34  | No Ct   | ND     | No Ct   | ND     | 0.4        |          |
| PMB667  | NG           | Z             |         | 21.61   | 21.47   | No Ct  | No Ct  | No Ct  | No Ct  | No Ct  | 35.49  | 35.34   | No Ct  | 18.47   | 15.58  | 0.1        |          |
| PMB1894 | NG           | E             |         | 24.09   | 23.84   | No Ct  | No Ct  | No Ct  | No Ct  | No Ct  | No Ct  | 22.15   | 21.5   | No Ct   | ND     | 0.2        |          |
| PMB596  | NG           | C             |         | 21.89   | 21.72   | No Ct  | 39.87  | 19.97  | 34.17  | No Ct  | No Ct  | No Ct   | ND     | No Ct   | ND     | 0.2        | 12.3     |
| PMB1266 | NG           | W             |         | 20.79   | 20.25   | No Ct  | No Ct  | No Ct  | 18.60  | No Ct  | No Ct  | No Ct   | ND     | No Ct   | ND     | 0.5        |          |
| PMB834  | NG           | B             |         | 20.74   | 20.53   | No Ct  | 18.47  | No Ct  | 26.28  | No Ct  | No Ct  | No Ct   | ND     | No Ct   | ND     | 0.2        | 5.5      |
| PMB1713 | NG           | E             |         | 22.06   | 24.40   | No Ct  | No Ct  | 32.77  | No Ct  | No Ct  | No Ct  | 18.09   | 19.25  | No Ct   | ND     | 2.3        | 10.7     |
| PMB2429 | NG           | Z             |         | 21.95   | 21.82   | No Ct  | 28.87  | No Ct  | No Ct  | No Ct  | No Ct  | No Ct   | No Ct  | 19.25   | 19.02  | 0.1        | 6.9      |
| PMB2607 | NG           | W             |         | 20.64   | 20.29   | No Ct  | 38.01  | No Ct  | 19.37  | No Ct  | No Ct  | No Ct   | ND     | No Ct   | ND     | 0.4        |          |
| PMB2023 | NG           | C             |         | 22.28   | 21.82   | No Ct  | 34.82  | 20.5   | No Ct  | No Ct  | No Ct  | No Ct   | ND     | No Ct   | ND     | 0.5        | 12.5     |
| PMB273  | NG           | W             |         | 12.07   | 9.73    | No Ct  | 24.45  | 23.71  | 11.19  | No Ct  | No Ct  | No Ct   | ND     | No Ct   | ND     | 2.3        | 12.5     |
| PMB1245 | NG           | Y/C           |         | 16.49   | 16.65   | No Ct  | 39.43  | 24.78  | No Ct  | No Ct  | 23.47  | No Ct   | ND     | No Ct   | ND     | 0.2        | 1.3      |
| PMB1652 | NG           | B             |         | 21.31   | 21.33   | No Ct  | 19.84  | No Ct  | No Ct  | No Ct  | No Ct  | No Ct   | ND     | No Ct   | ND     | 0.0        |          |
| PMB3521 | NG           | B             |         | 20.37   | 20.17   | No Ct  | 18.66  | No Ct  | No Ct  | No Ct  | No Ct  | 32.62   | ND     | No Ct   | ND     | 0.2        | 12.2     |
| PMB1972 | NG           | Y             |         | 21.78   | 21.38   | No Ct  | 36.29  | No Ct  | No Ct  | No Ct  | 19.96  | No Ct   | ND     | No Ct   | ND     | 0.4        |          |
| PMB981  | NG           | E             |         | 20.86   | 20.53   | No Ct  | No Ct  | No Ct  | No Ct  | No Ct  | No Ct  | 16.79   | 15.89  | No Ct   | ND     | 0.3        |          |
| PMB2216 | NG           | E             |         | 22.32   | 24.64   | No Ct  | No Ct  | No Ct  | No Ct  | No Ct  | No Ct  | 20.13   | 16.06  | No Ct   | ND     | 2.3        |          |
| PMB1343 | NG           | B             |         | 21.04   | 20.45   | No Ct  | 18.94  | No Ct  | No Ct  | No Ct  | No Ct  | No Ct   | ND     | No Ct   | ND     | 0.6        |          |
| PMB739  | NG           | W             |         | 20.26   | 19.66   | No Ct  | No Ct  | No Ct  | 17.09  | No Ct  | No Ct  | No Ct   | ND     | No Ct   | ND     | 0.6        |          |
| PMB1363 | NG           | E             |         | 21.66   | 21.60   | No Ct  | 34.2   | No Ct  | No Ct  | No Ct  | No Ct  | 18.82   | 15.43  | No Ct   | ND     | 0.1        | 12.5     |
| PMB101  | NG           | Y             |         | 21.77   | 21.74   | No Ct  | No Ct  | No Ct  | No Ct  | No Ct  | 20.33  | No Ct   | ND     | No Ct   | ND     | 0.0        |          |
| PMB1359 | NG           | E             |         | 23.01   | 25.01   | No Ct  | No Ct  | No Ct  | No Ct  | No Ct  | No Ct  | 21.31   | 19.57  | No Ct   | ND     | 2.0        |          |
| PMB3150 | NG           | C             |         | 21.83   | 21.53   | No Ct  | 35.9   | 19.45  | No Ct  | No Ct  | No Ct  | 36.48   | ND     | No Ct   | ND     | 0.3        |          |
| PMB275  | NG           | Y             |         | 23.07   | 23.04   | No Ct  | No Ct  | No Ct  | 39.72  | No Ct  | 24.25  | No Ct   | ND     | No Ct   | ND     | 0.0        |          |
| PMB1030 | NG           | E             |         | 27.57   | 29.96   | No Ct  | No Ct  | No Ct  | No Ct  | No Ct  | No Ct  | 29.03   | 28.31  | No Ct   | ND     | 2.4        |          |
| PMB3619 | NG           | W             |         | 22.62   | 22.09   | No Ct  | No Ct  | No Ct  | 23.7   | No Ct  | No Ct  | 38.38   | ND     | No Ct   | ND     | 0.5        |          |
| PMB1598 | NG           | C             |         | 15.52   | 15.61   | No Ct  | 37.11  | 10.50  | No Ct  | No Ct  | No Ct  | No Ct   | ND     | No Ct   | ND     | 0.1        |          |



| Strain  | Group (SASG) | GGroup rt-PCR | cnl PCR | porA Ct | ctrA Ct | NmA Ct | NmB Ct | NmC Ct | NmW Ct | NmX Ct | NmY Ct | NmE Ct* | NmE Ct | NmZ Ct* | NmZ Ct | porA -ctrA | Delta Ct |
|---------|--------------|---------------|---------|---------|---------|--------|--------|--------|--------|--------|--------|---------|--------|---------|--------|------------|----------|
| PMB1871 | NG           | C             |         | 22.88   | 22.73   | No Ct  | No Ct  | 23.47  | No Ct  | No Ct  | No Ct  | No Ct   | ND     | No Ct   | ND     | 0.2        |          |
| PMB417  | NG           | E             |         | 21.88   | 23.22   | No Ct  | No Ct  | No Ct  | 33.03  | No Ct  | No Ct  | 17.54   | 15.43  | No Ct   | ND     | 1.3        | 11.1     |
| PMB879  | NG           | E             |         | 13.97   | 15.24   | No Ct  | No Ct  | No Ct  | No Ct  | No Ct  | No Ct  | 18.42   | 18.07  | No Ct   | ND     | 1.3        |          |

NG: nongroupable using SASG assay

NGG: nongenogroupable using rt-PCR assays

*cnl*: positive PCR product (<400bp) from *tex* to *galE*

NR: negative *cnl* PCR and negative rt-PCR

ND: not done

\*: Results with MenE and MenZ specific primer-probes located at 5' end of *ctrA*

Delta Ct: difference in Ct values between *porA* and genogrouping assay with Ct of 30–35.
